# Supplementary material
Source: ML conference proceedings conference paper supplement (https://openreview.net/forum?id=XvGQ6F3sG8)
Supplement: supplementary_material [file attachment]

## 1 A Algorithm Description of ADMM

2 We use Alternating Direction Methods of Multipliers (ADMM) to solve convex optimization problem  
 3 in RPCA and TensorRPCA, and the details are shown in Algorithm1 and Algorithm2 which are  
 4 named Matrix ADMM and Tensor ADMM, respectively.

---

### Algorithm 1: Matrix ADMM

---

**Input:** matrix data  $X$ , parameter  $\lambda$ .

**Initialization:**  $H_0 = S_0 = Y_0 = 0$ ,  $\rho = 1.1$ ,  $\mu_0 = 1e - 3$ ,  $\epsilon = 1e - 8$ .

**while not converged do**

    % Singular Value Thresholding %;

    1. Update  $H_{k+1}$  by  $H_{k+1} = \arg \min_H \|H\|_* + \frac{\mu_k}{2} \|H + S_k - X + \frac{Y_k}{\mu_k}\|_F^2$ ;

    % Soft-Thresholding %;

    2. Update  $S_{k+1}$  by  $S_{k+1} = \arg \min_S \lambda \|S\|_1 + \frac{\mu_k}{2} \|H_{k+1} + S - X + \frac{Y_k}{\mu_k}\|_F^2$ ;

    3.  $Y_{k+1} = H_k + \mu_k(H_{k+1} - S_{k+1} - X)$ ;

    4. Update  $\mu_{k+1}$  by  $\mu_{k+1} = \rho \mu_k$ ;

    5. Check the convergence conditions

$$\|H_{k+1} - H_k\|_\infty \leq \epsilon, \|S_{k+1} - S_k\|_\infty \leq \epsilon, \|H_{k+1} - S_{k+1} - X\|_\infty \leq \epsilon;$$

**end**

---



---

### Algorithm 2: Tensor ADMM

---

**Input:** tensor data  $\mathcal{X}$ , parameter  $\lambda$ .

**Initialization:**  $\mathcal{H}_0 = \mathcal{S}_0 = \mathcal{Y}_0 = 0$ ,  $\rho = 1.1$ ,  $\mu_0 = 1e - 2$ ,  $\epsilon = 1e - 5$ .

**while not converged do**

    % Singular Value Thresholding %;

    1. Update  $\mathcal{H}_{k+1}$  by  $\mathcal{H}_{k+1} = \arg \min_{\mathcal{H}} \|\mathcal{H}\|_* + \frac{\mu_k}{2} \|\mathcal{H} + \mathcal{S}_k - \mathcal{X} + \frac{\mathcal{Y}_k}{\mu_k}\|_F^2$ ;

    % Soft-Thresholding %;

    2. Update  $\mathcal{S}_{k+1}$  by  $\mathcal{S}_{k+1} = \arg \min_{\mathcal{S}} \lambda \|\mathcal{S}\|_1 + \frac{\mu_k}{2} \|\mathcal{H}_{k+1} + \mathcal{S} - \mathcal{X} + \frac{\mathcal{Y}_k}{\mu_k}\|_F^2$ ;

    3.  $\mathcal{Y}_{k+1} = \mathcal{H}_k + \mu_k(\mathcal{H}_{k+1} - \mathcal{S}_{k+1} - \mathcal{X})$ ;

    4. Update  $\mu_{k+1}$  by  $\mu_{k+1} = \min(\rho \mu_k, \mu_{\max})$ ;

    5. Check the convergence conditions

$$\|\mathcal{H}_{k+1} - \mathcal{H}_k\|_\infty \leq \epsilon, \|\mathcal{S}_{k+1} - \mathcal{S}_k\|_\infty \leq \epsilon, \|\mathcal{H}_{k+1} - \mathcal{S}_{k+1} - \mathcal{X}\|_\infty \leq \epsilon;$$

**end**

---

## 7 B Select Similar Ego-networks

8 In section 3.3, we enhance LRD-GNN-Matrix to tensor version LRD-GNN-Tensor. The ego-networks  
 9 around nodes which are similar with target node are selected to construct tensor. We evaluate  
 10 similarity from two perspectives. (1) We select nodes which have similar attributes with target node.  
 11 For instance, the Cosine Similarity is used to measure the similarity of attributes between nodes. (2)  
 12 We select nodes which have similar local structures with target node. We use the Shannon entropy  
 13 value of ego-network to measure local structure similarity. For the ego-network  $\mathcal{G}_i = (\mathcal{V}_i, \mathcal{E}_i)$  around  
 14  $v_i$ , the Shannon entropy value  $H(\mathcal{G}_i)$  is defined as

$$H(\mathcal{G}_i) = - \sum_{v \in \mathcal{V}_i} P(v) \log P(v) \quad (1)$$

15 where  $P(v)$  is the probability of the random walking visiting  $v$  in ego-network. Then, we choose  
 16 several nodes' ego-networks that are close to the Shannon entropy value of the central node to  
 17 construct tensor.

18 Besides, to combine information from different orders, we also utilize the selected nodes' ego-  
19 networks after propagation(i.e.,  $AX, A^2X$ ) as part of the tensor. The specific methods for constructing  
20 tensor and the performance have been presented in section 4.1.3 Ablation Study.
